# Supplementary material for: A Performance Evaluation of Two Hyperspectral Imaging Systems for the Prediction of Strawberries’ Pomological Traits
Source: MDPI journal article supplement (doi:10.3390/s24010174), 2023-12-28
Supplement: s1 [file s1]

**Supplementary Table S1.** Visible Near Infrared spectrometer. Neural network architectures and correlation coefficients for the developed ANN models. The best architecture for each parameter was highlighted in bold.

| Neural Network<br>Topologies<br>(input-hidden-output) |                       | Activation Function |                   | Training Set               | Test Set                   |
|-------------------------------------------------------|-----------------------|---------------------|-------------------|----------------------------|----------------------------|
|                                                       |                       | Hidden<br>Neurons   | Output<br>Neurons | Correlation<br>coefficient | Correlation<br>coefficient |
| FF                                                    | <b>MLP (204–11–1)</b> | <b>Logistic</b>     | <b>Identity</b>   | <b>0.8258</b>              | <b>0.8989</b>              |
|                                                       | MLP (204–21–1)        | Logistic            | Logistic          | 0.6944                     | 0.6546                     |
|                                                       | MLP (204–14–1)        | Tanh                | Logistic          | 0.6149                     | 0.5642                     |
|                                                       | MLP (204–11–1)        | Exp                 | Exp               | 0.7011                     | 0.6620                     |
|                                                       | MLP (204–16–1)        | Tanh                | Exp               | 0.5951                     | 0.5525z                    |
| TSS                                                   | <b>MLP (204–22–1)</b> | <b>Exp</b>          | <b>Tanh</b>       | <b>0.9834</b>              | <b>0.9793</b>              |
|                                                       | MLP (204–9–1)         | Tanh                | Logistic          | 0.9653                     | 0.9278                     |
|                                                       | MLP (204–8–1)         | Tanh                | Tanh              | 0.9752                     | 0.9209                     |
|                                                       | MLP (204–19–1)        | Tanh                | Identity          | 0.9814                     | 0.9230                     |
|                                                       | MLP (204–11–1)        | Exp                 | Tanh              | 0.9884                     | 0.9193                     |
| TA                                                    | <b>MLP (204–16–1)</b> | <b>Identity</b>     | <b>Identity</b>   | <b>0.9864</b>              | <b>0.9365</b>              |
|                                                       | MLP (204–9–1)         | Identity            | Exp               | 0.9710                     | 0.9216                     |
|                                                       | MLP (204–9–1)         | Identity            | Logistic          | 0.9832                     | 0.9273                     |
|                                                       | MLP (204–19–1)        | Identity            | Identity          | 0.9867                     | 0.9358                     |
|                                                       | MLP (204–22–1)        | Identity            | Exp               | 0.9707                     | 0.9221                     |
| DM                                                    | <b>MLP (204–19–1)</b> | <b>Exp</b>          | <b>Exp</b>        | <b>0.9834</b>              | <b>0.9731</b>              |
|                                                       | MLP (204–21–1)        | Tanh                | Exp               | 0.8869                     | 0.8743                     |
|                                                       | MLP (204–22–1)        | Tanh                | Exp               | 0.9059                     | 0.9052                     |
|                                                       | MLP (204–23–1)        | Logistic            | Exp               | 0.9094                     | 0.9188                     |
|                                                       | MLP (204–20–1)        | Exp                 | Logistic          | 0.8595                     | 0.8941                     |

Legend: MLP = multilayer perceptron; Tanh = hyperbolic tangent function; Exp = exponential function; FF = firmness (N); TSS = total soluble solid content (g 100 g<sup>-1</sup> FW); TA = titratable acidity (mEq L<sup>-1</sup>); DM = dry matter (g 100 g<sup>-1</sup> FW).

**Supplementary Table S2.** Short Wave Infrared spectrometer. Neural network architectures and correlation coefficients for the developed ANN models. The best architecture for each parameter was highlighted in bold.

| Neural Network<br>Topologies<br>(input-hidden-output) |                | Activation Function |                   | Training Set               | Test Set                   |
|-------------------------------------------------------|----------------|---------------------|-------------------|----------------------------|----------------------------|
|                                                       |                | Hidden<br>Neurons   | Output<br>Neurons | Correlation<br>coefficient | Correlation<br>coefficient |
| FF                                                    | MLP (224–10–1) | Logistic            | Identity          | 0.9654                     | 0.9055                     |
|                                                       | MLP (224–25–1) | Tanh                | Identity          | 0.9611                     | 0.8282                     |
|                                                       | MLP (224–23–1) | Identity            | Logistic          | 0.9711                     | 0.8995                     |
|                                                       | MLP (224–9–1)  | Identity            | Identity          | 0.9780                     | 0.8162                     |
|                                                       | MLP (224–10–1) | Tanh                | Logistic          | 0.9214                     | 0.8870                     |
| TSS                                                   | MLP (224–11–1) | Logistic            | Identity          | 0.9823                     | 0.9476                     |
|                                                       | MLP (224–14–1) | Identity            | Tanh              | 0.9754                     | 0.9401                     |
|                                                       | MLP (224–14–1) | Identity            | Identity          | 0.9768                     | 0.9458                     |
|                                                       | MLP (224–10–1) | Logistic            | Tanh              | 0.9699                     | 0.9400                     |
|                                                       | MLP (224–13–1) | Logistic            | Identity          | 0.9768                     | 0.9422                     |
| TA                                                    | MLP (224–19–1) | Logistic            | Exp               | 0.9935                     | 0.9762                     |
|                                                       | MLP (224–18–1) | Logistic            | Exp               | 0.9605                     | 0.9041                     |
|                                                       | MLP (224–22–1) | Tanh                | Identity          | 0.9484                     | 0.9036                     |
|                                                       | MLP (224–13–1) | Tanh                | Logistic          | 0.9719                     | 0.9022                     |
|                                                       | MLP (224–20–1) | Logistic            | Identity          | 0.9581                     | 0.9272                     |
| DM                                                    | MLP (224–11–1) | Logistic            | Exp               | 0.9905                     | 0.9612                     |
|                                                       | MLP (224–25–1) | Logistic            | Tanh              | 0.9954                     | 0.9323                     |
|                                                       | MLP (224–21–1) | Logistic            | Tanh              | 0.9682                     | 0.9585                     |
|                                                       | MLP (224–19–1) | Tanh                | Identity          | 0.9955                     | 0.9440                     |
|                                                       | MLP (224–16–1) | Tanh                | Tanh              | 0.9702                     | 0.9584                     |

Legend: MLP = multilayer perceptron; Tanh = hyperbolic tangent function; Exp = exponential function; FF = firmness (N); TSS = total soluble solid content (g 100 g<sup>-1</sup> FW); TA = titratable acidity (mEq L<sup>-1</sup>); DM = dry matter (g 100 g<sup>-1</sup> FW).
